# Supplementary material
Source: MDPI journal article supplement (https://www.mdpi.com/2073-4395/13/2/424)
Supplement: s1 [file s1]

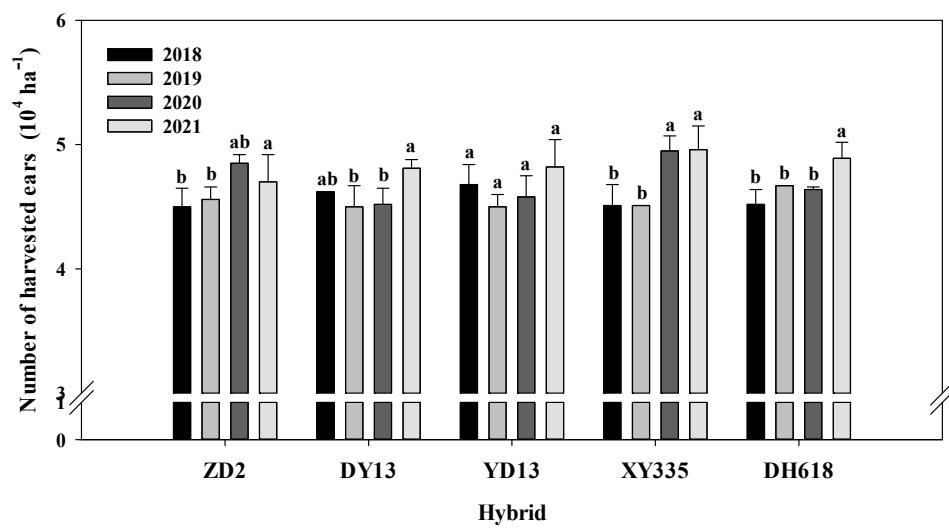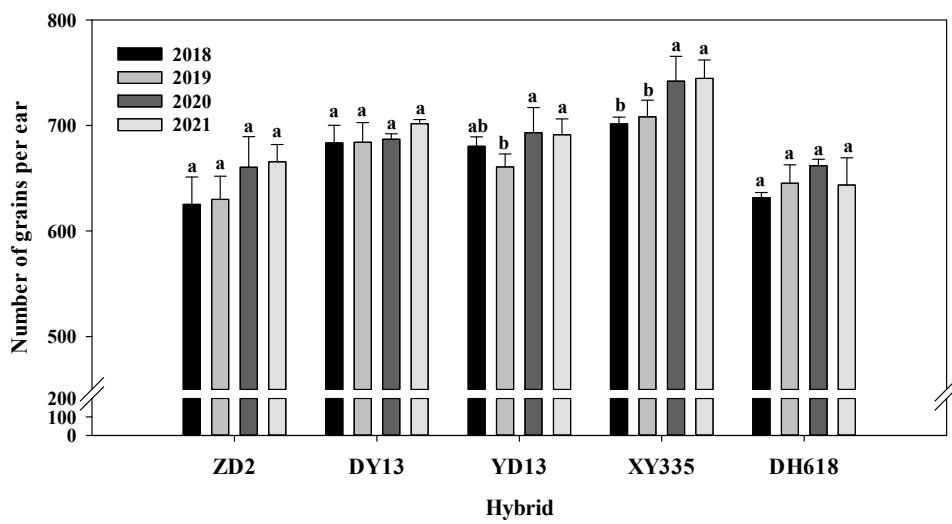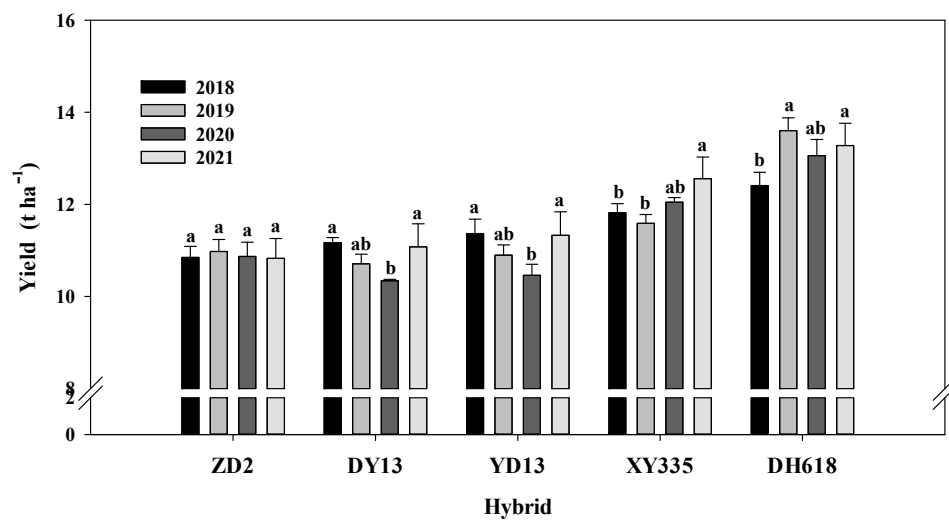

Figure S1. Differences in yield and component factors of maize varieties under different meteorological conditions
